# Supplementary material
Source: PubMed Central journal article supplement (PMC3753893)
Supplement: supp_12-10207_IOVS-12-10207-s01.pdf [file supp_12-10207_IOVS-12-10207-s01.pdf]

## Supplement Figure 1

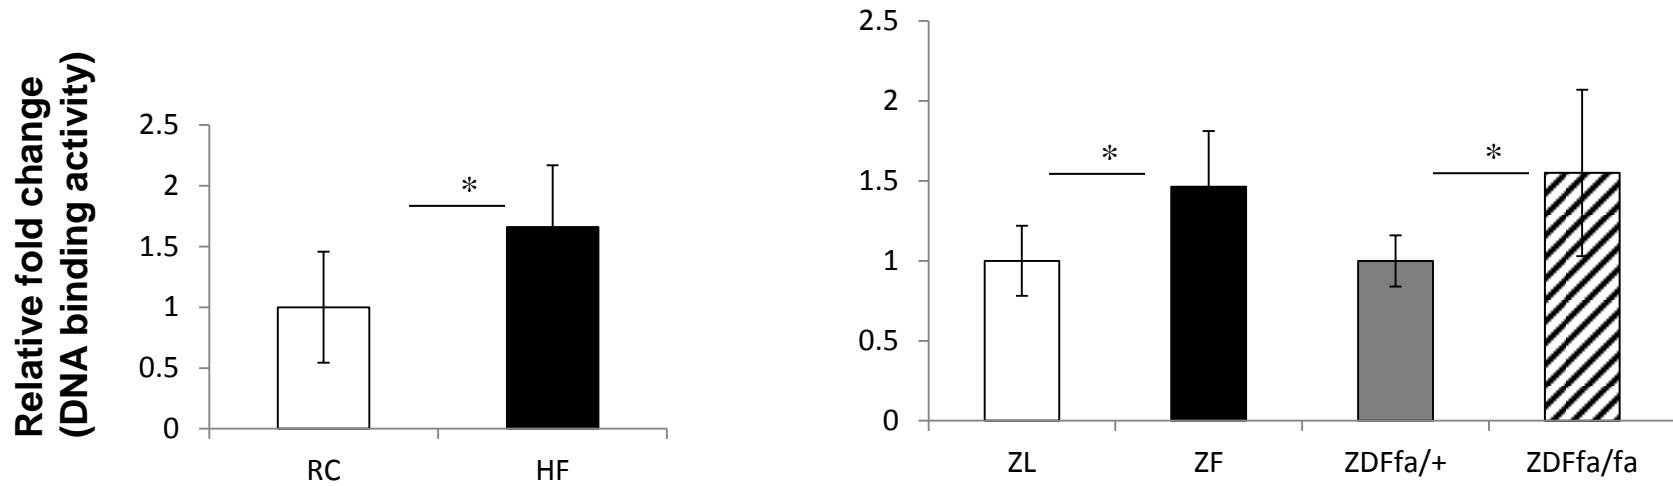

### Supplement Figure 1. NF- $\kappa$ B DNA binding activity in the retina of insulin resistant and diabetic rodents.

NF- $\kappa$ B DNA binding activity was measured in the retinas from 2 months of high fat feeding mice, ZL, ZF, ZDF<sup>fa/+</sup>, and diabetic ZDF<sup>fa/fa</sup>.
